# Supplementary material for: Expression and cellular trafficking of GP82 and GP90 glycoproteins during Trypanosoma cruzi metacyclogenesis
Source: PubMed Central journal article supplement (PMC3652755; doi:10.1186/1756-3305-6-127), 2013-05-01
Supplement: 1756-3305-6-127-S1.pdf [file 1756-3305-6-127-S1.pdf]

Flow cytometry analysis of parasites populations

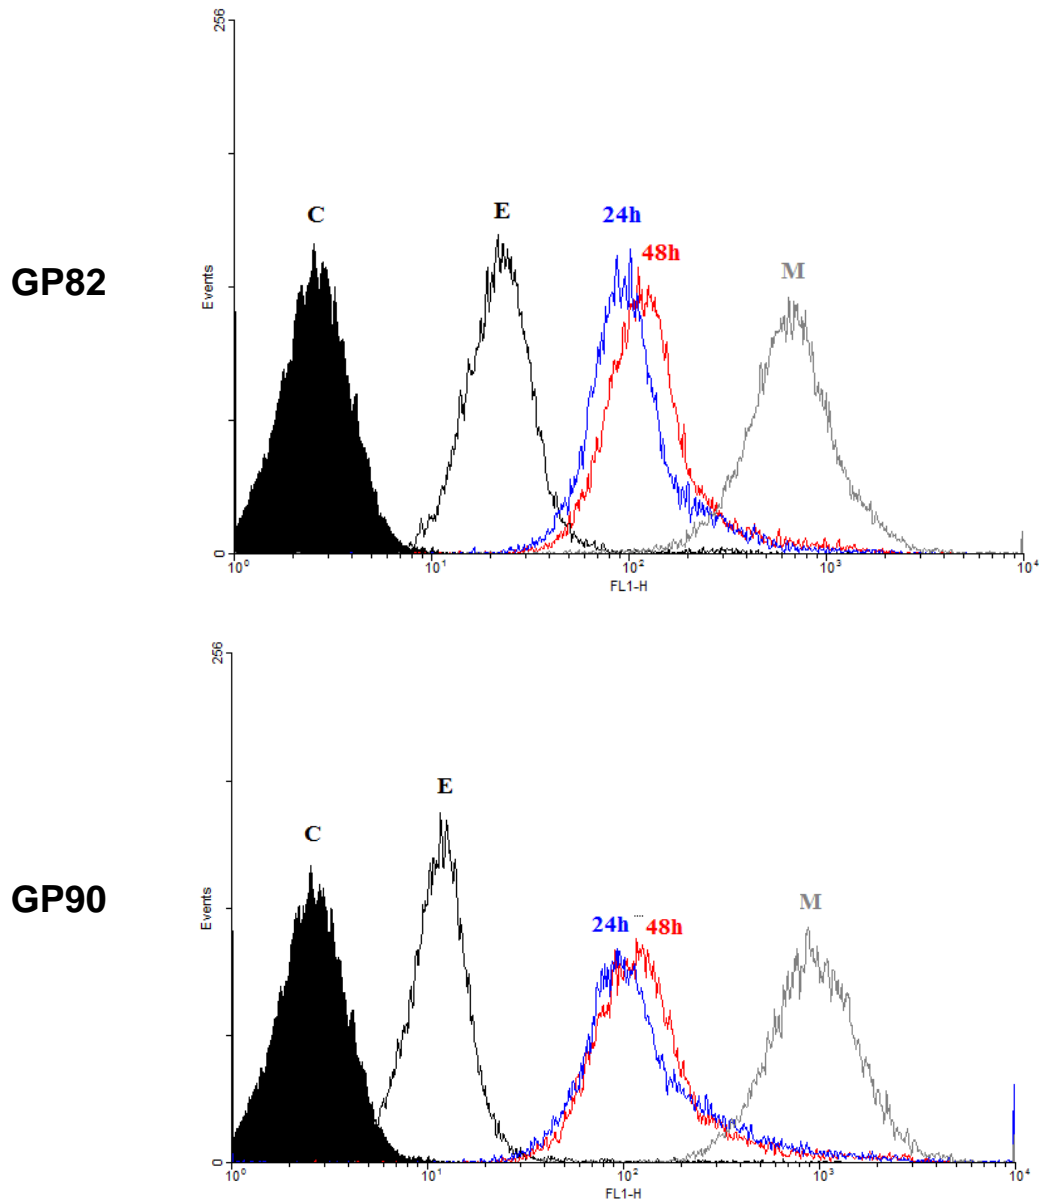

**Legend:**

**Control (C):** epimastigotes incubated with Alexa Fluor 488

**Epimastigotes (E):** epimastigotes incubated with mAb 3F6 or 1G7 followed by Alexa Fluor 488

**Attached parasites 24 h (24h):** intermediate forms incubated with mAb 3F6 or 1G7 followed by Alexa Fluor 488

**Attached parasites 48 h (48h):** intermediate forms incubated with mAb 3F6 or 1G7 followed by Alexa Fluor 488

**Metacyclic forms (M):** metacyclic forms incubated with mAb 3F6 or 1G7 followed by Alexa Fluor 488
